# Supplementary material for: TGF-β Regulates DNA Methyltransferase Expression in Prostate Cancer, Correlates with Aggressive Capabilities, and Predicts Disease Recurrence
Source: PubMed Central journal article supplement (PMC3184137; doi:10.1371/journal.pone.0025168), 2011-09-30
Supplement: pone.0025168.s010.pdf [file pone.0025168.s010.pdf]

Office for the Protection  
of Research Subjects  
Northwestern University  
750 N. Lake Shore Drive  
Suite 700  
Chicago, Illinois 60611  
ocuc@northwestern.edu  
Phone: 312-503-9339  
Fax: 312-503-0112

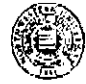

NORTHWESTERN  
UNIVERSITY

August 8, 2007

Chung Lee  
Department of Urology  
Tarry 16-733  
Chicago Campus

Protocol: 2007-0565  
TGF-beta Antibody in Pre-clinical Cancer Immunotherapy

Approved Animal Numbers/Species: 265 Mice  
Funding Agency: Genzyme Corporation

The Northwestern University Animal Care and Use Committee (NUACUC) approved the use of animals on the ASP referenced above for the three year period 8/8/2007 through 8/7/2010.

Northwestern University has an Animal Welfare Assurance on file with the Office of Laboratory Animal Welfare (A3283-01). Northwestern University conducts its reviews in accordance with United States Public Health Service (USPHS) regulations and applicable federal and local laws. The composition of the NUACUC meets the requirements of the USPHS policy and the Animal Welfare Act Regulations.

For the Committee,

A handwritten signature in cursive script, appearing to read "CJ Heckman".

CJ Heckman, Ph.D.  
Chairman, NUACUC

/hl

cc: OSR  
CCM
